# Supplementary figures and images for: Umbilical Cord-Derived CD362+ Mesenchymal Stromal Cells Attenuate Polymicrobial Sepsis Induced by Caecal Ligation and Puncture
Source: MDPI journal article supplement (doi:10.3390/ijms21218270), 2020-11-04

# HEART

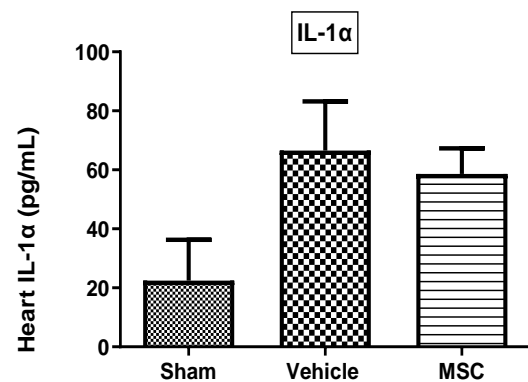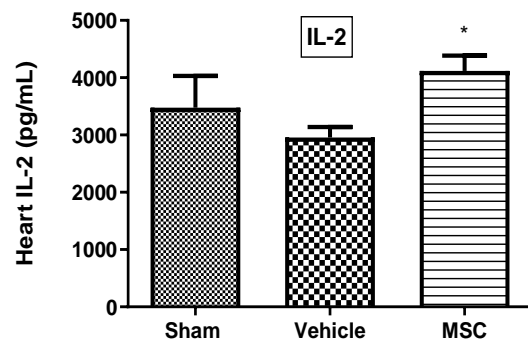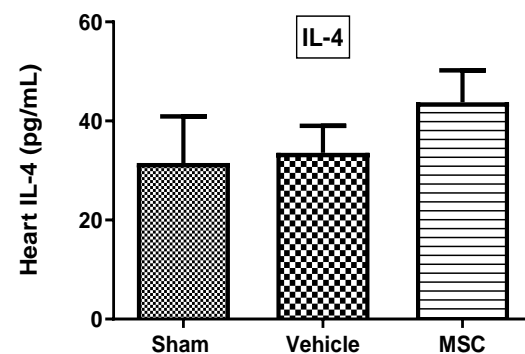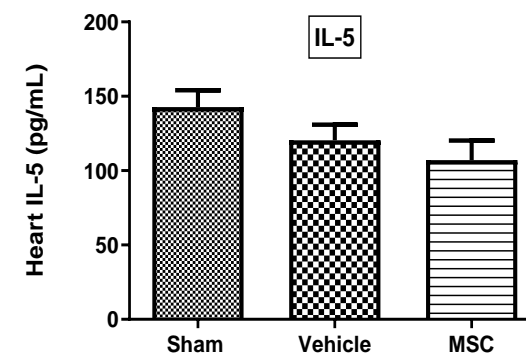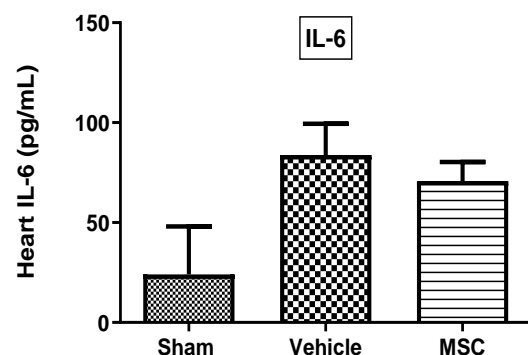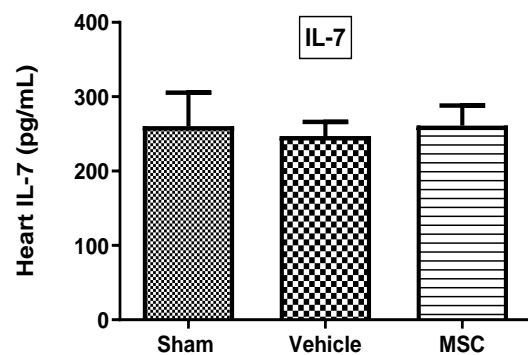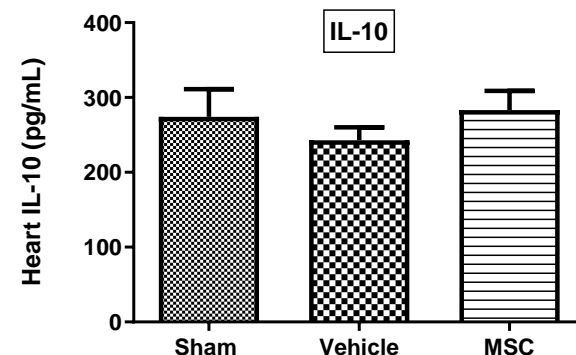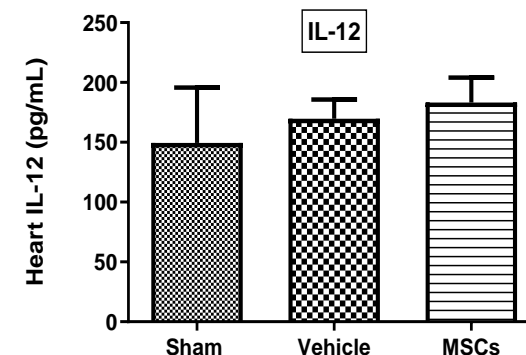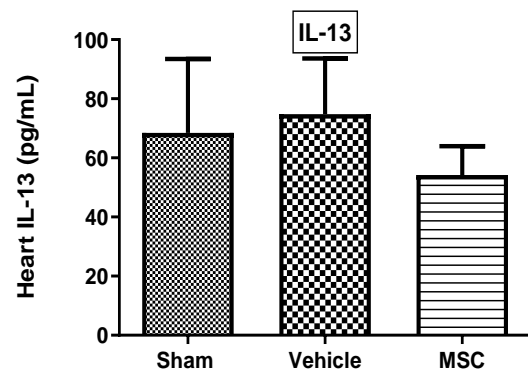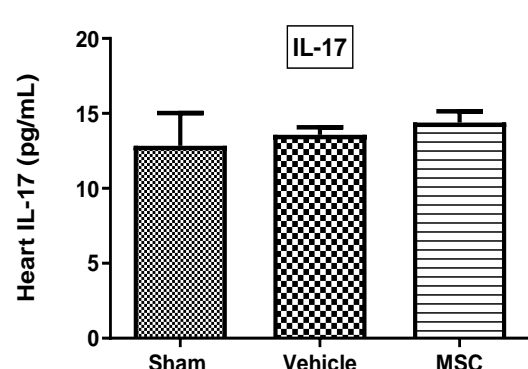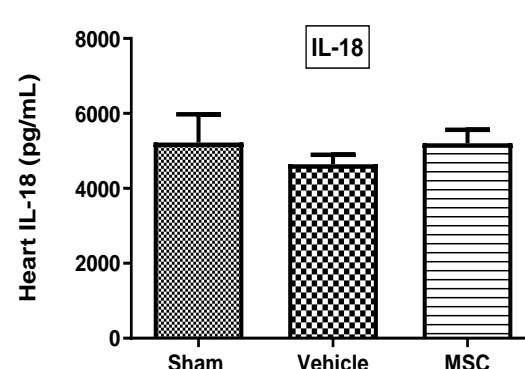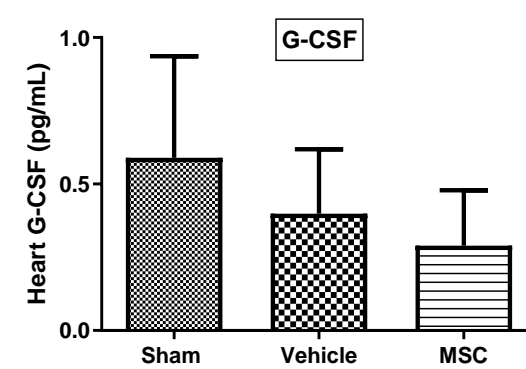

# HEART

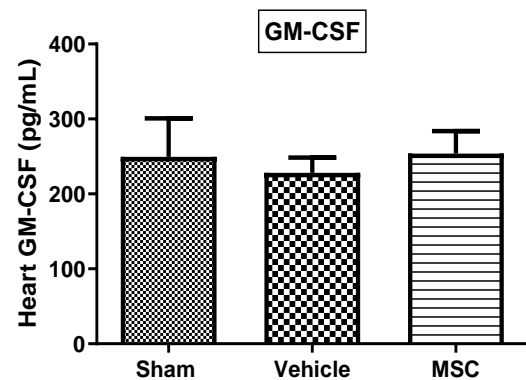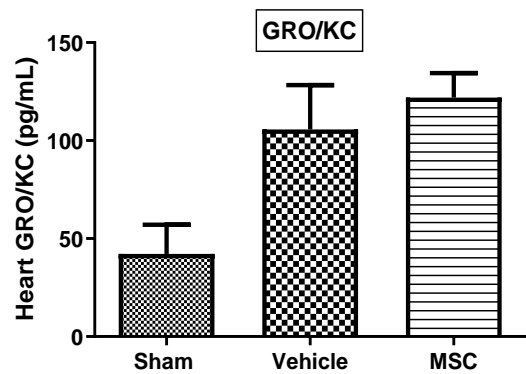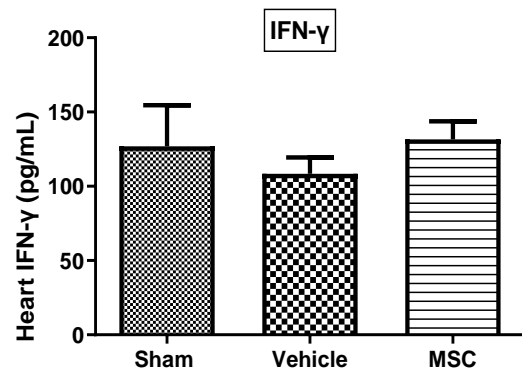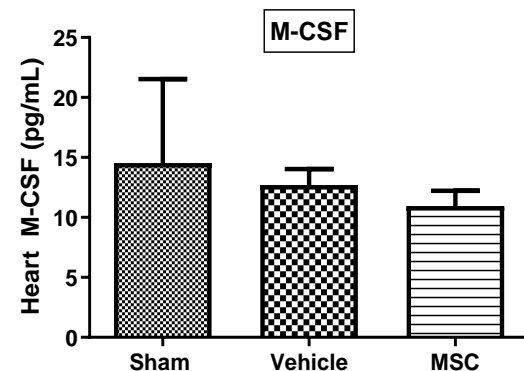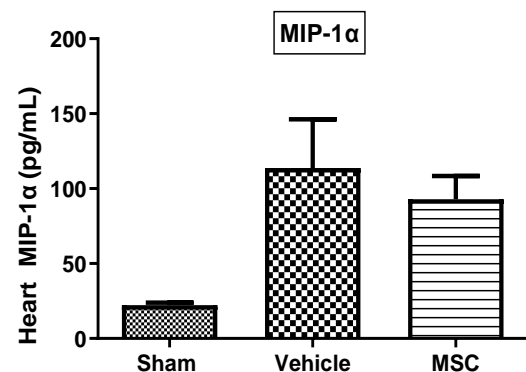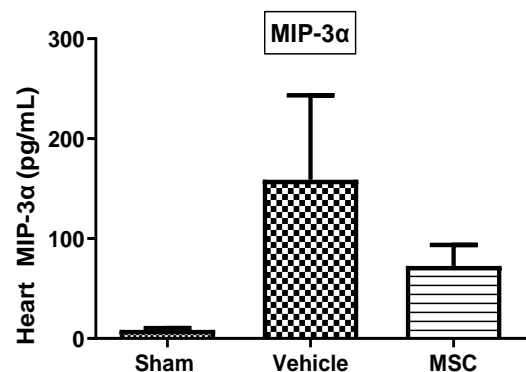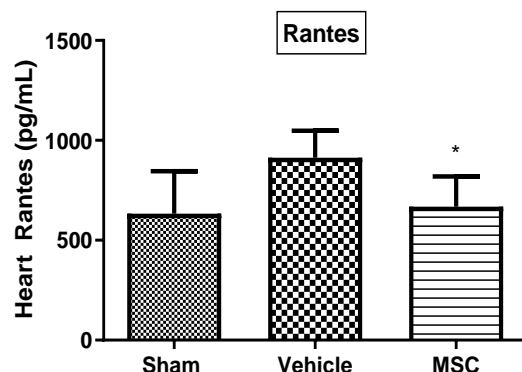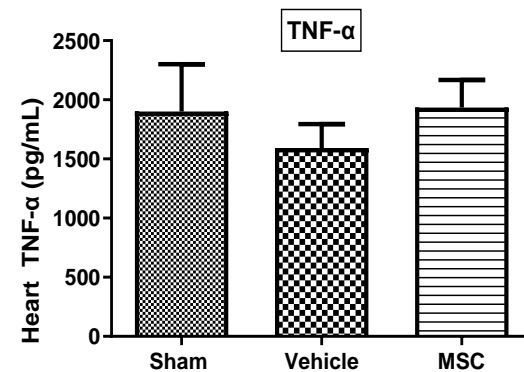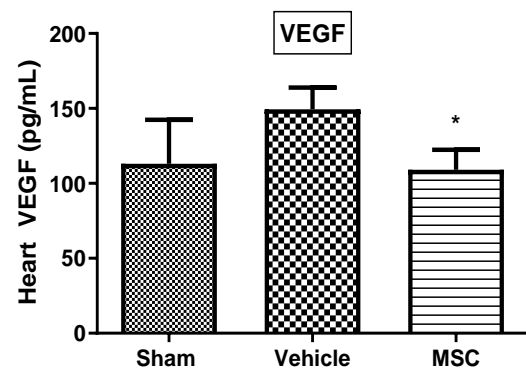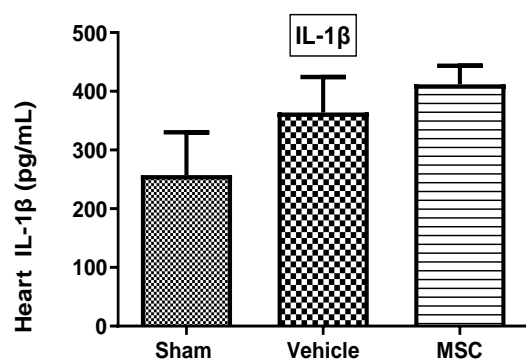

LIVER

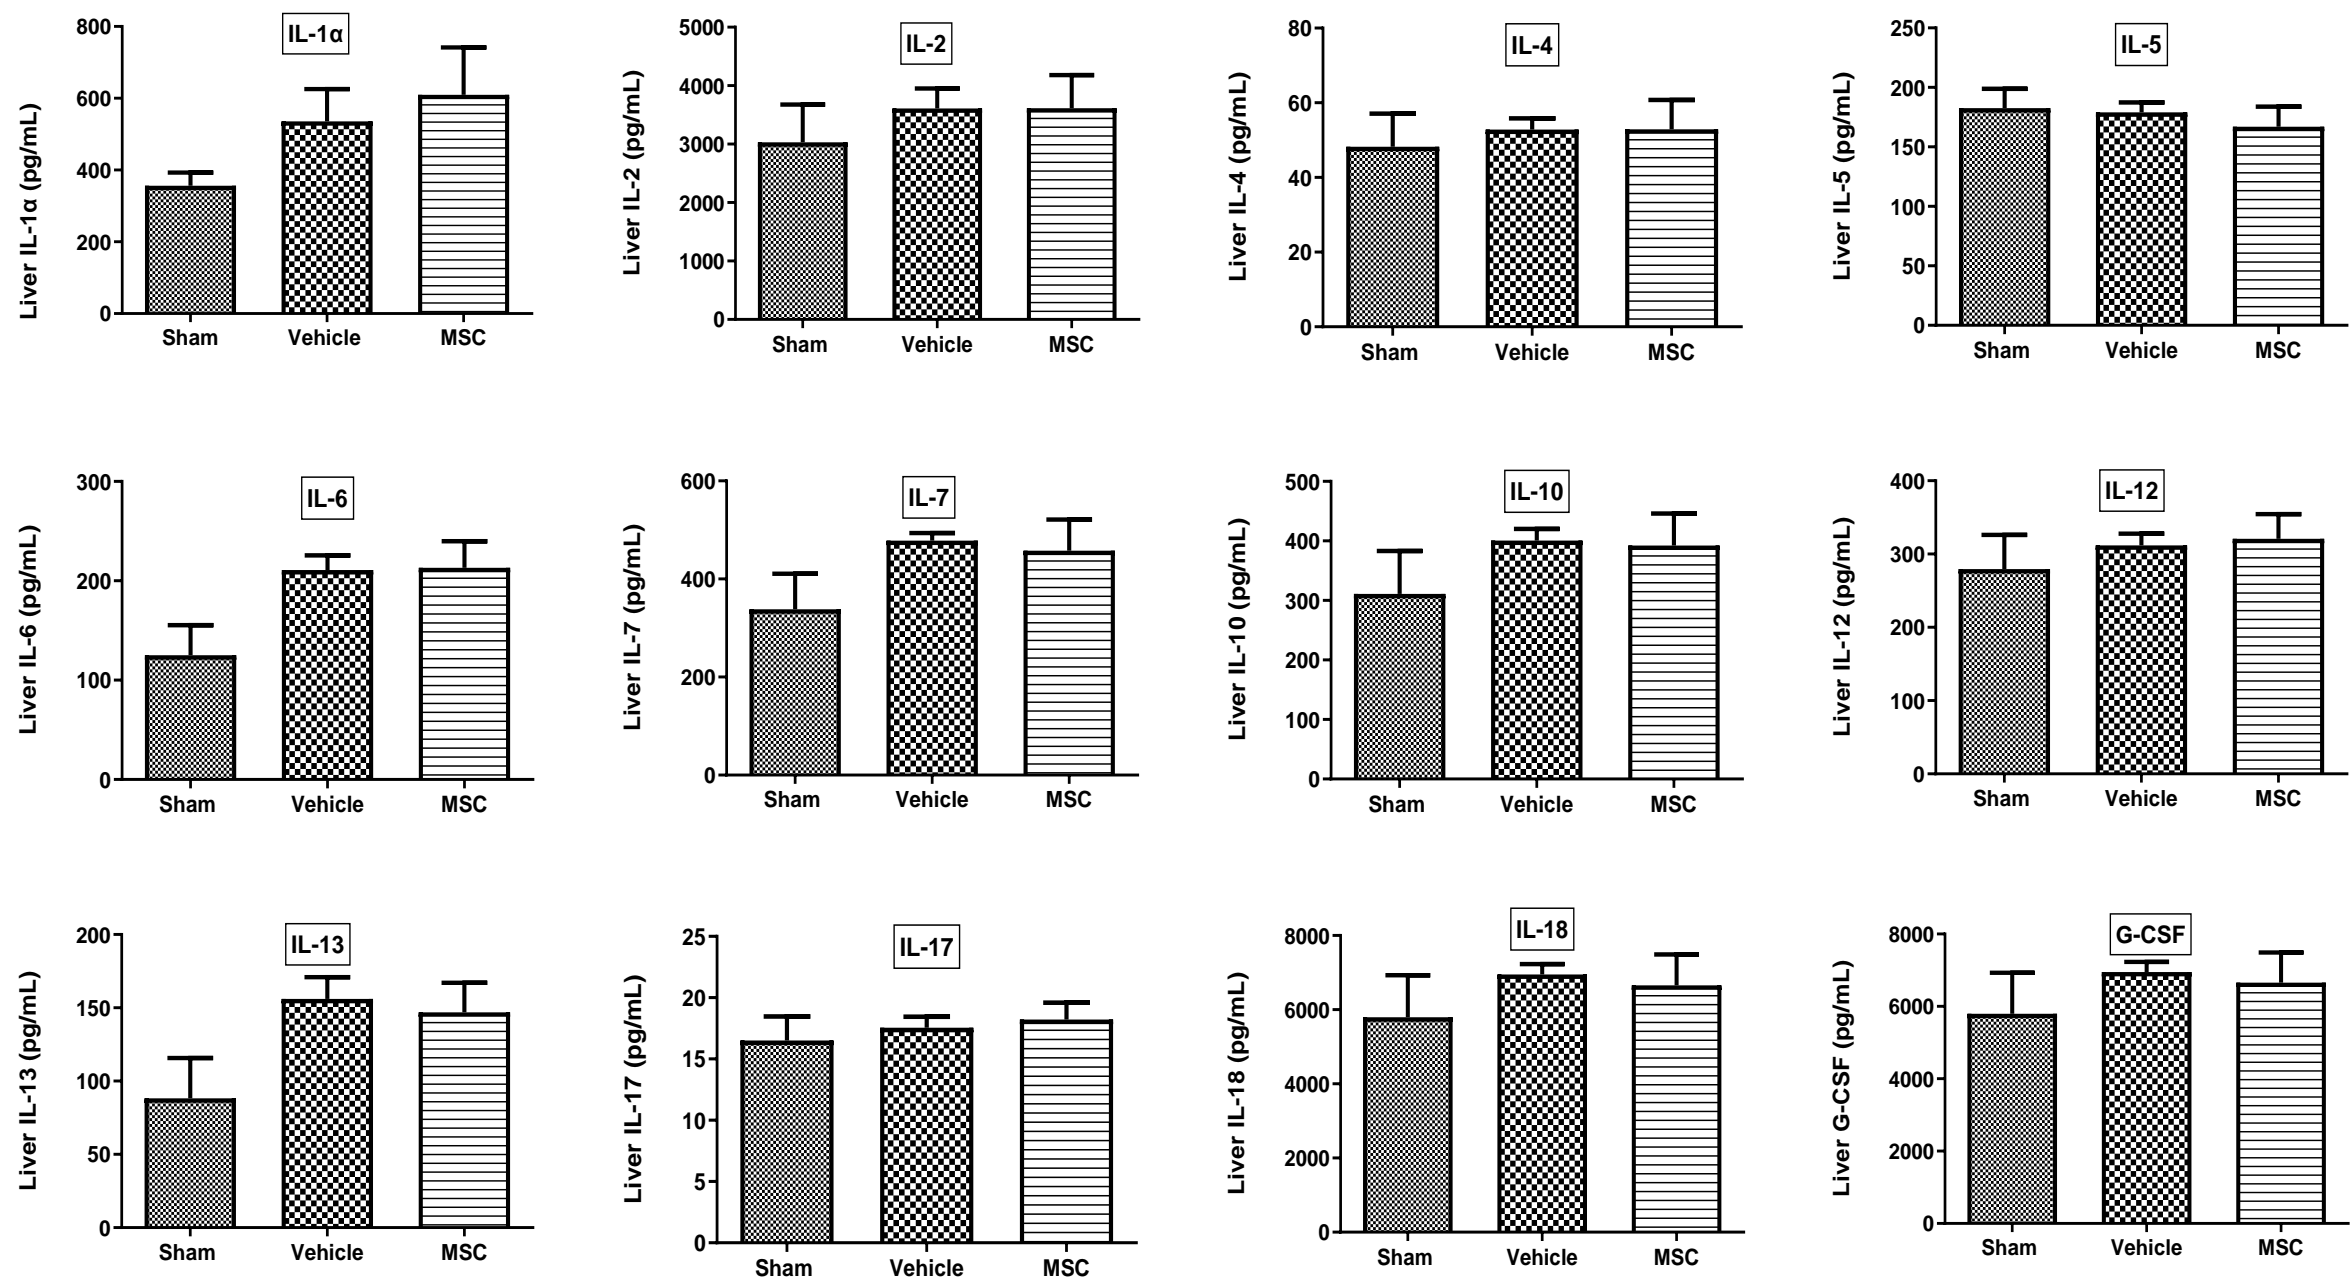

LIVER

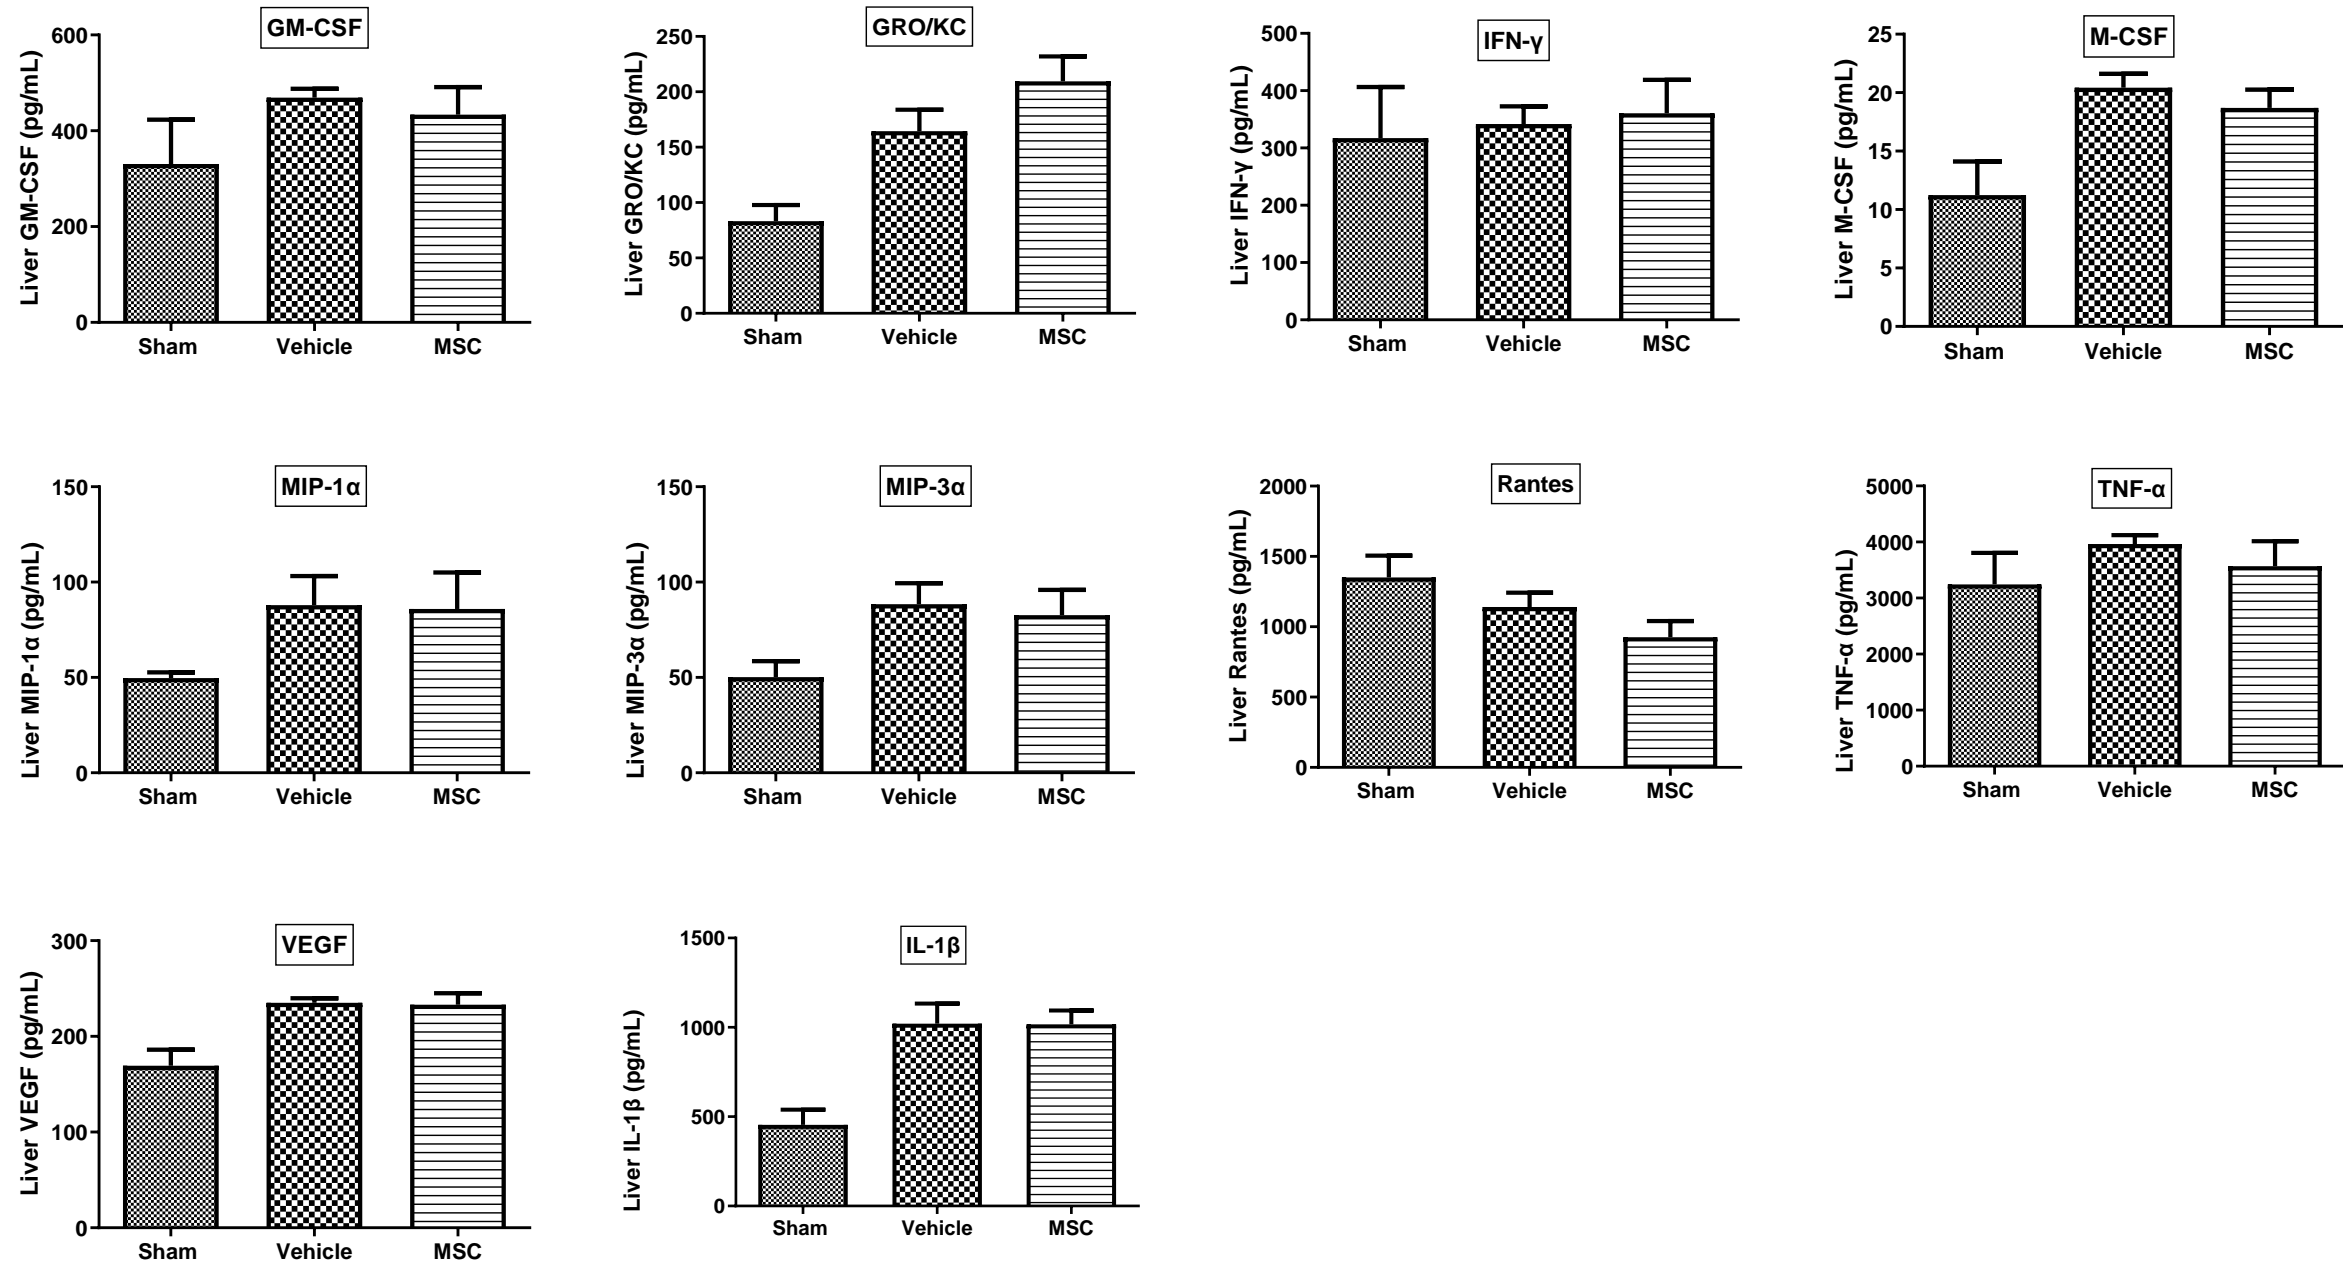

SERUM

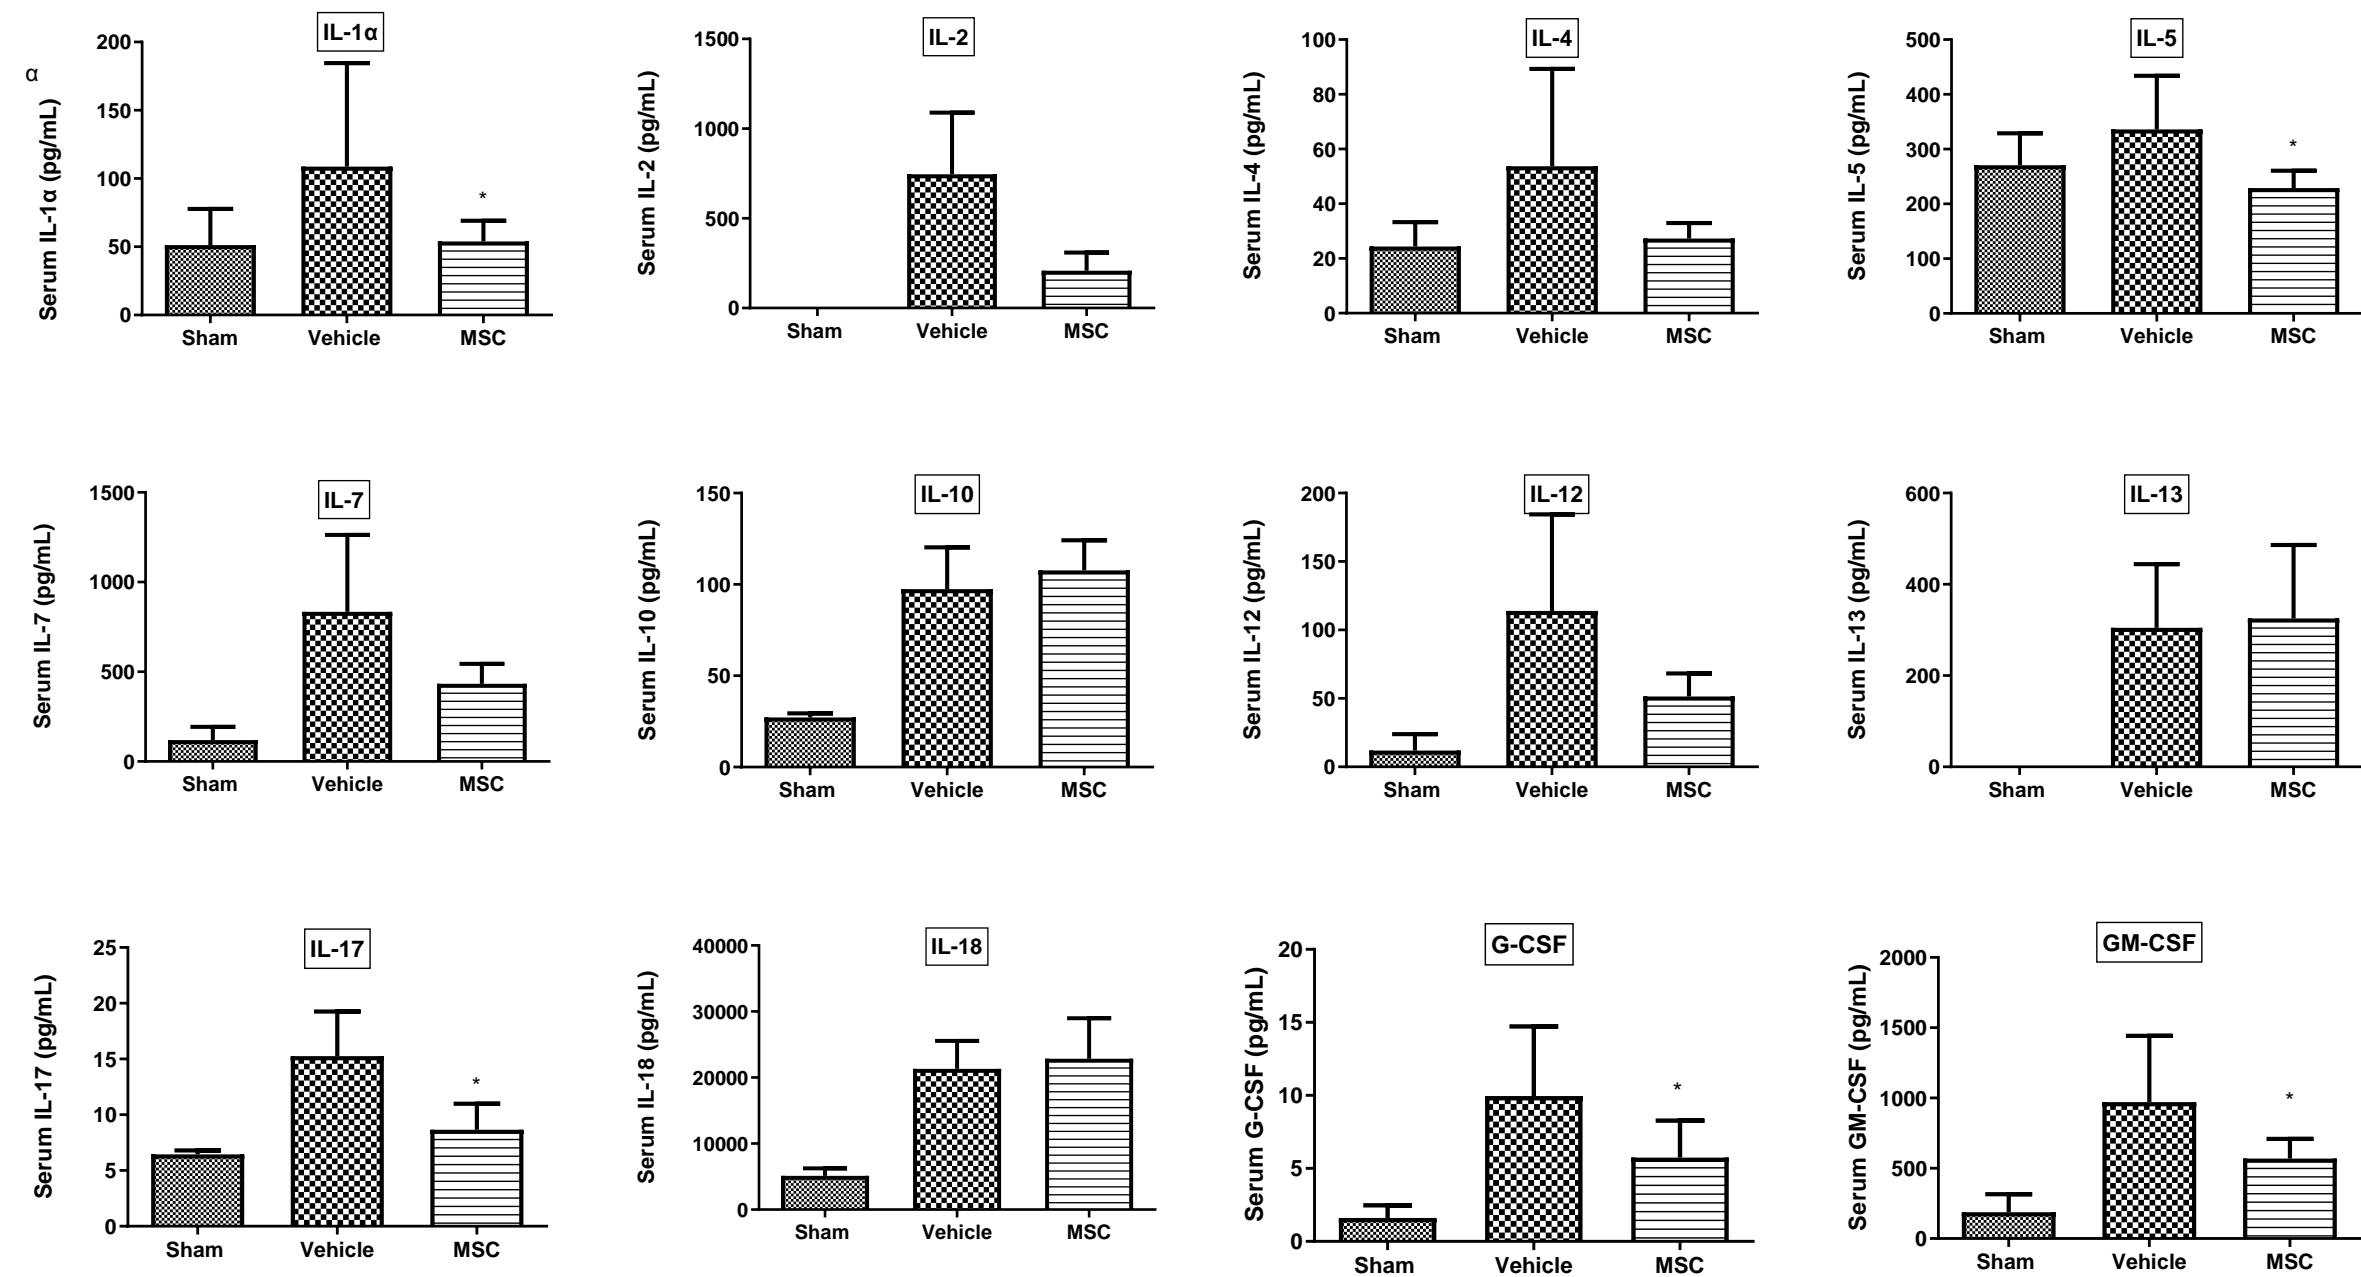

SERUM

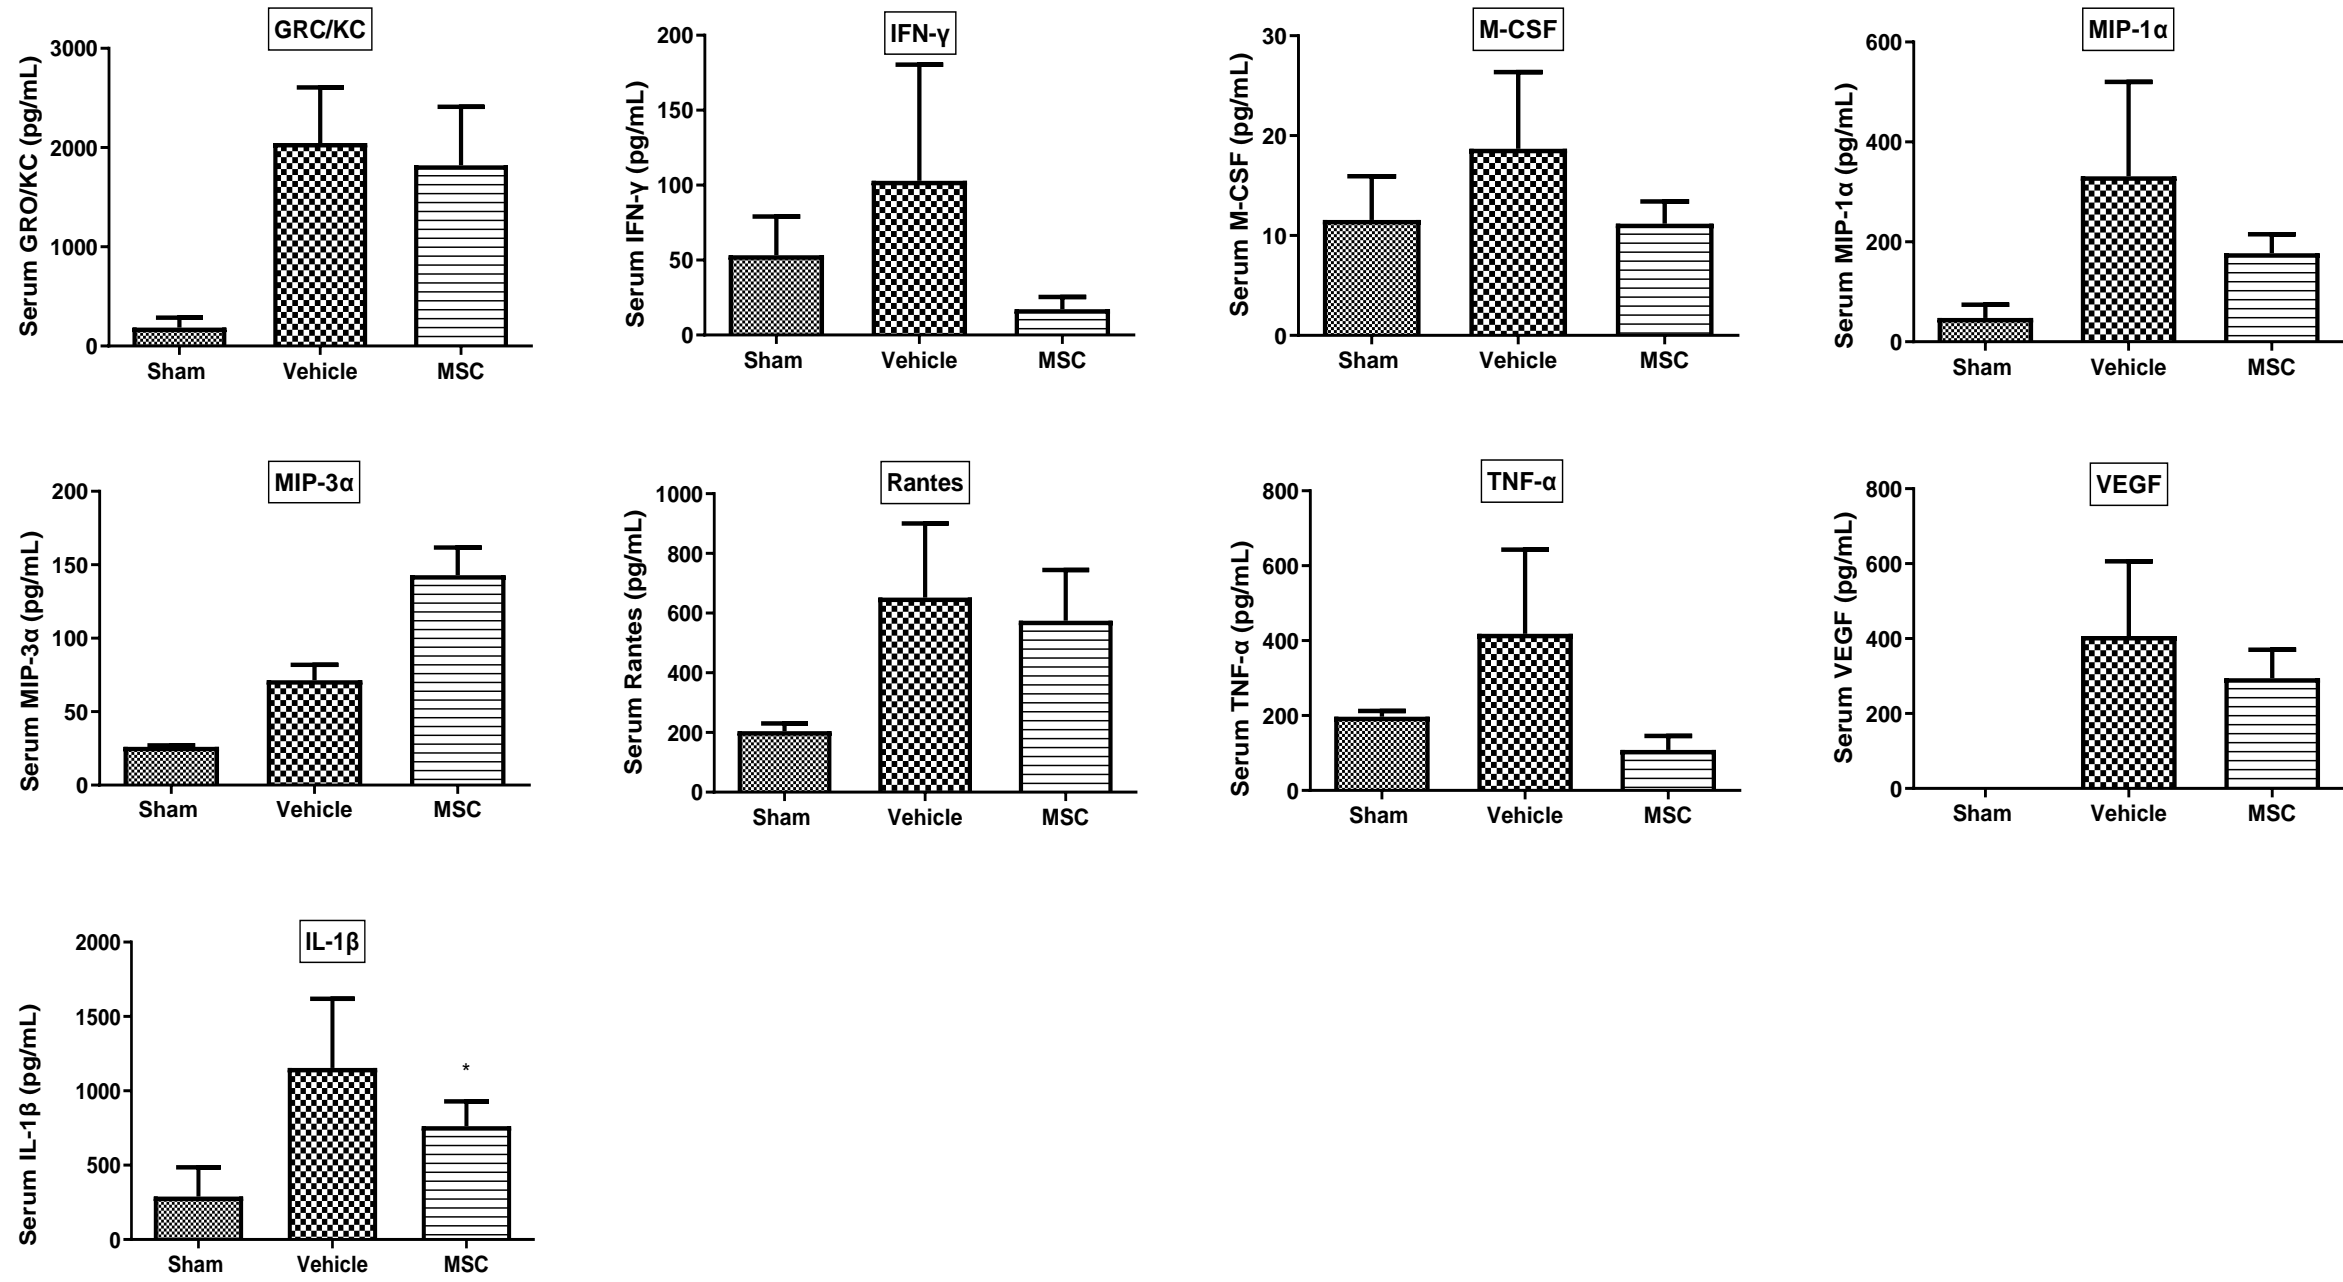

Supplement: s1 [file s1]
